# Supplementary material for: Interface-engineering studies on the photoelectric properties and stability of the CsSnI3–SnS heterostructure
Source: Royal Society of Chemistry journal article supplement (doi:10.1039/d2cp02742a), 2022-01-01

## Supporting information

### First-Principles Study of Interface Properties of CsSnI<sub>3</sub>-SnS heterostructure

Yongyi Peng<sup>1</sup>, Chenxi Gu<sup>1</sup>, Biao Liu<sup>1\*</sup>, Meng-Qiu Cai<sup>2</sup>, Junliang Yang<sup>1</sup>

1. Hunan Key Laboratory for Super-microstructure and Ultrafast Process, School of Physics and Electronics, Central South University, Changsha 410083, Hunan, China

2. School of Physics and Electronics Science, Hunan University, Changsha 410082, Hunan, China

\*Corresponding author. E-mail: [bliu612@csu.edu.cn](mailto:bliu612@csu.edu.cn).

Table S1 Bandgaps (HSE06 functional) of SnS monolayer, CsI interface and SnI<sub>2</sub> interface at pre-contact state and contact state in the CsSnI<sub>3</sub>-SnS heterostructure.

|             | SnS-CsI |      | SnS-SnI <sub>2</sub> |                  |
|-------------|---------|------|----------------------|------------------|
|             | SnS     | CsI  | SnS                  | SnI <sub>2</sub> |
| Pre-contact | 2.08    | 1.48 | 2.18                 | 1.68             |
| Contact     | 1.92    | 1.46 | 2.39                 | 1.28             |

Table S2 Comparison between the calculated and experimental values of the bandgap of CsSnI<sub>3</sub> and SnS

|                    | calculated value |       | experiment value | Other calculated values |
|--------------------|------------------|-------|------------------|-------------------------|
|                    | PBE              | HSE06 |                  |                         |
| CsSnI <sub>3</sub> | 0.83             | 1.28  | 1.3 <sup>1</sup> | 1.04 <sup>3</sup>       |
| SnS                | 0.98             | 1.19  | 1.3 <sup>2</sup> | 1.07 <sup>4</sup>       |

### References

1. I. Chung, J.-H. Song, J. Im, J. Androulakis, C. D. Malliakas, H. Li, A. J. Freeman, J. T. Kenney and M. G. Kanatzidis, *J. Am. Chem. Soc.*, 2012, **134**, 8579-8587.
2. K. T. Ramakrishna Reddy, N. Koteswara Reddy and R. W. Miles, *Sol. Energy Mat. Sol. C*, 2006, **90**, 3041-3046.
3. A. Amudhavalli, R. Padmavathy, R. Rajeswarapalanichamy and K. Iyakutti, *Indian J. Phys.*, 2019, **94**, 1351-1359.
4. J. Vidal, S. Lany, M. d’Avezac, A. Zunger, A. Zakutayev, J. Francis and J. Tate, *Appl. Phys. Lett.*, 2012, **100**, 032104.

Fig. S1 The molecular dynamics simulation is calculated for the (a) CsI/SnS and (b) SnI<sub>2</sub>/SnS heterostructures at room temperature (300K).

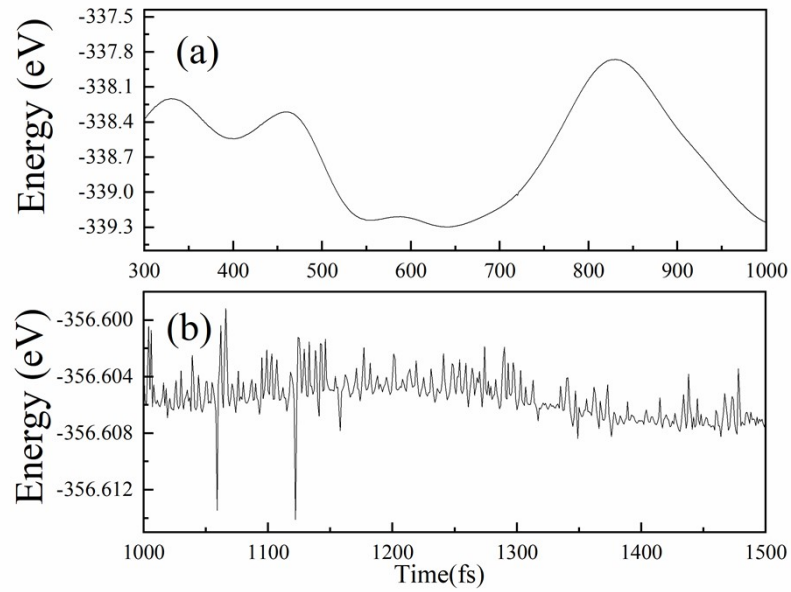

Fig. S2 Band structures of (a) CsI-SnS and (b) SnI<sub>2</sub>-SnS heterostructure. The blue and red lines denote the contribution from CsSnI<sub>3</sub> and SnS, respectively. The Fermi level is set at zero.

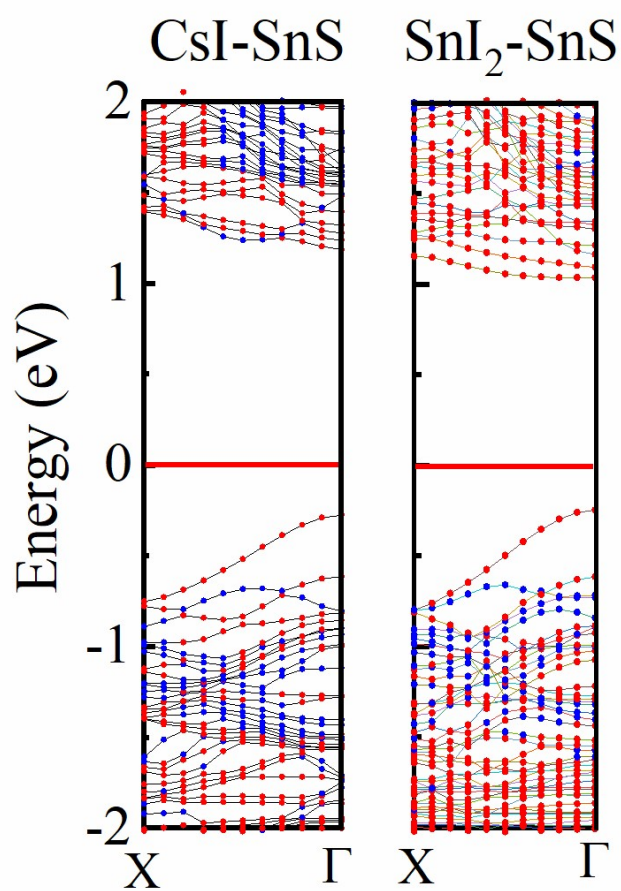

Fig. S3 The total density of states (DOS) of I, Sn, Cs, and S atoms of (a) CsI-SnS and (b) SnI<sub>2</sub>-SnS heterostructure. The DOS of interfacial atomic states of Sn and I in (c) CsI-SnS interface and Sn and S atom in SnI<sub>2</sub>-SnS interface.

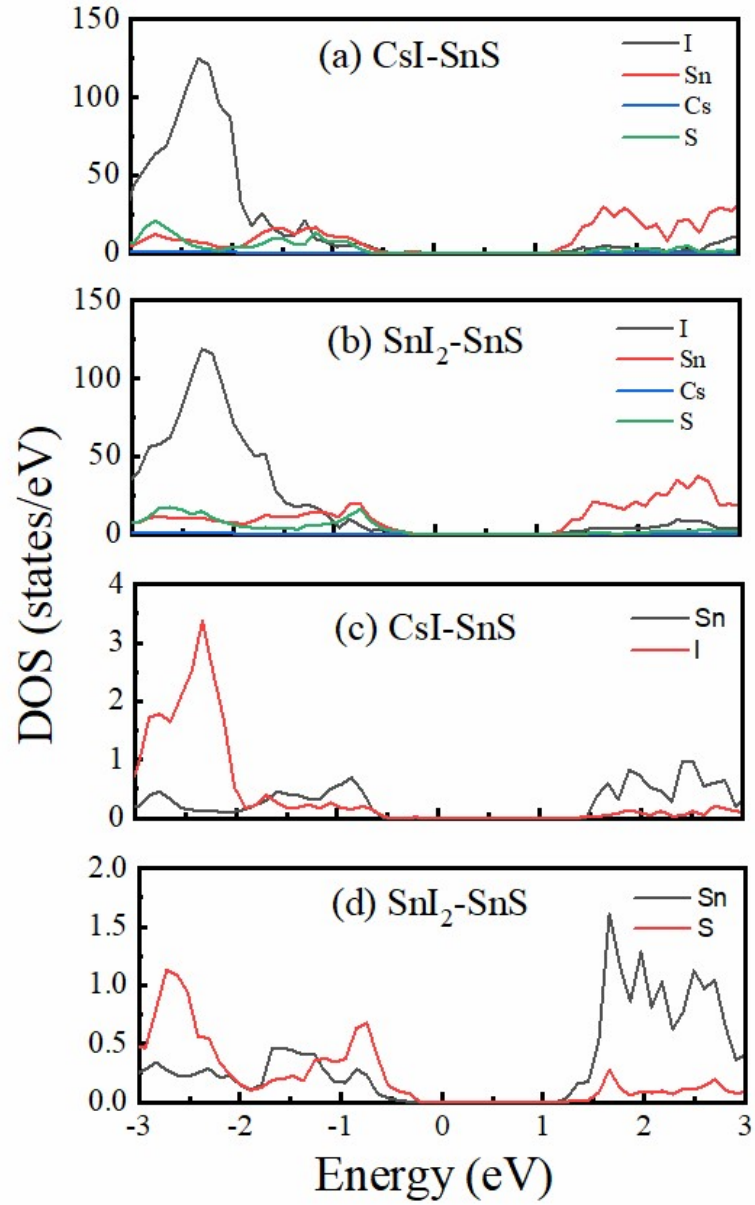

Supplement: d2cp02742a1.pdf [file d2cp02742a1.pdf]
